# Supplementary material
Source: ML conference proceedings conference paper supplement (https://openreview.net/forum?id=4fGx_EHhc2)

Max. distance to safe boundary

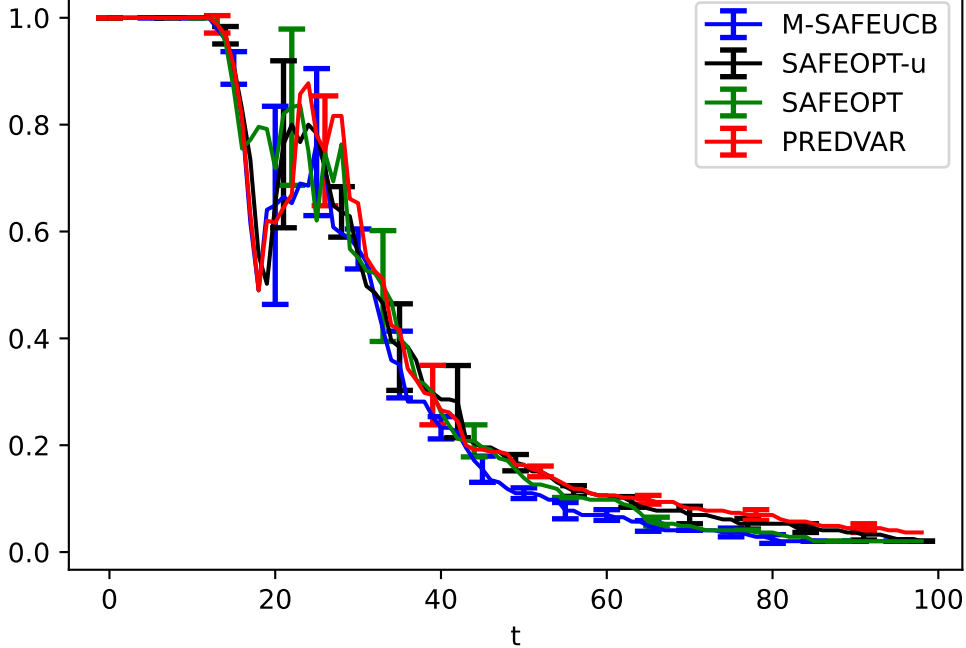

Supplement: supplementary_material [file attachment]

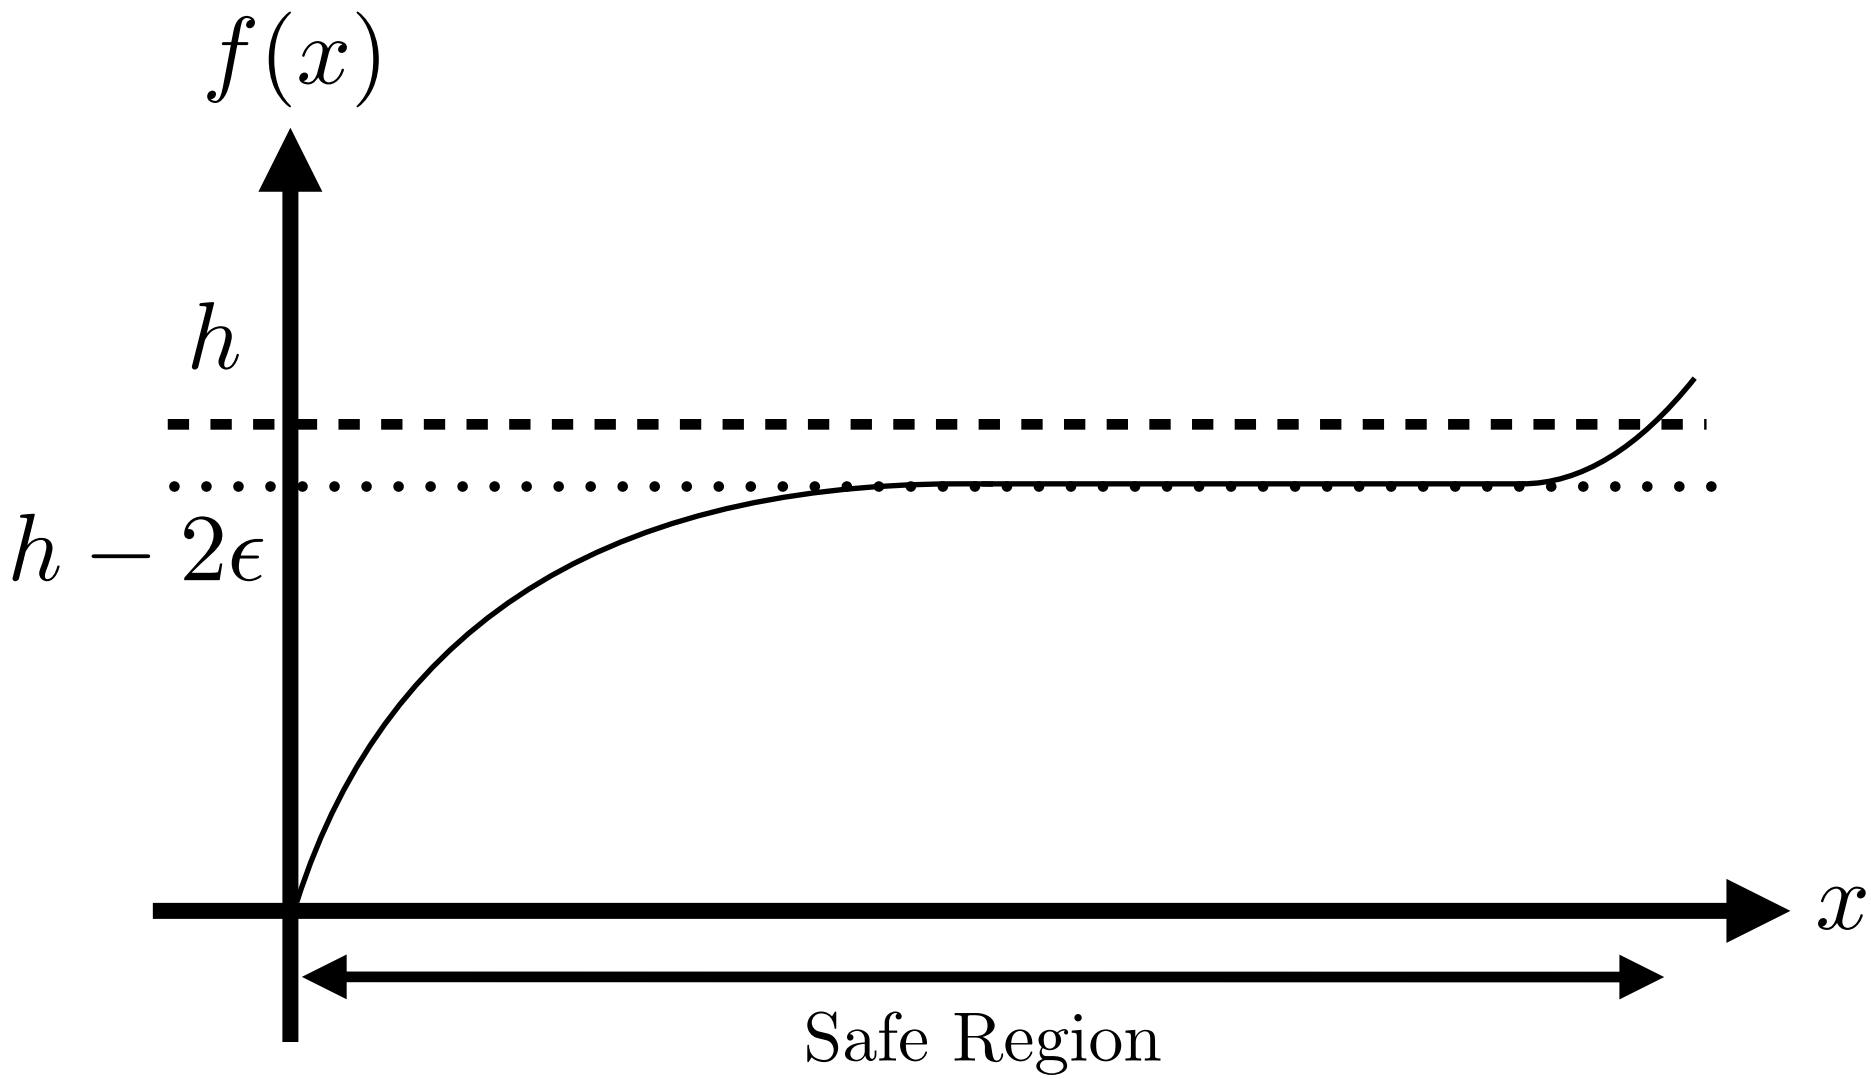

Supplement: supplementary_material [file attachment]

Max. distance to safe boundary

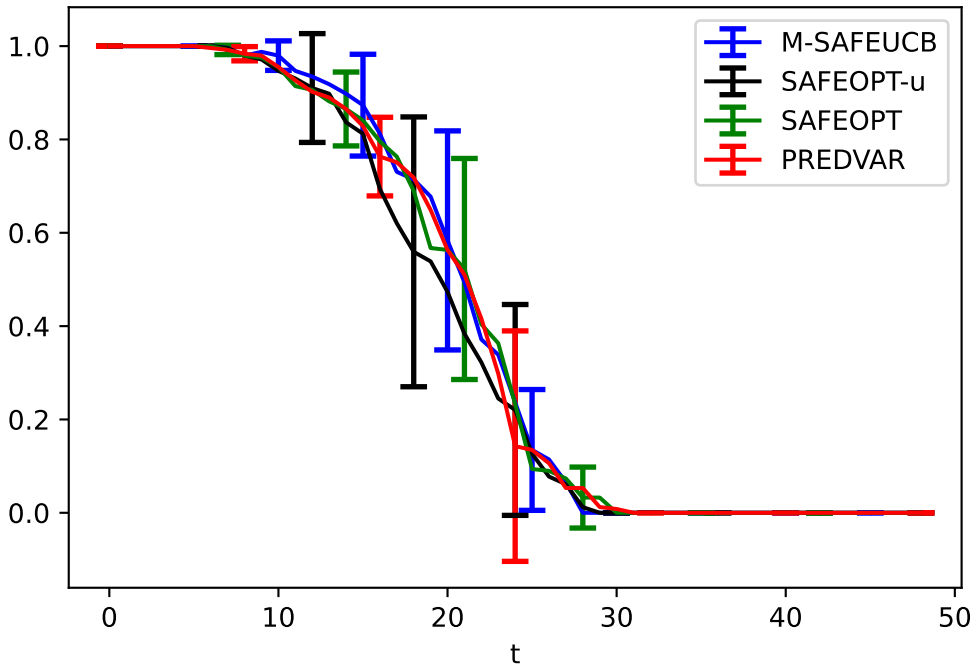

Supplement: supplementary_material [file attachment]

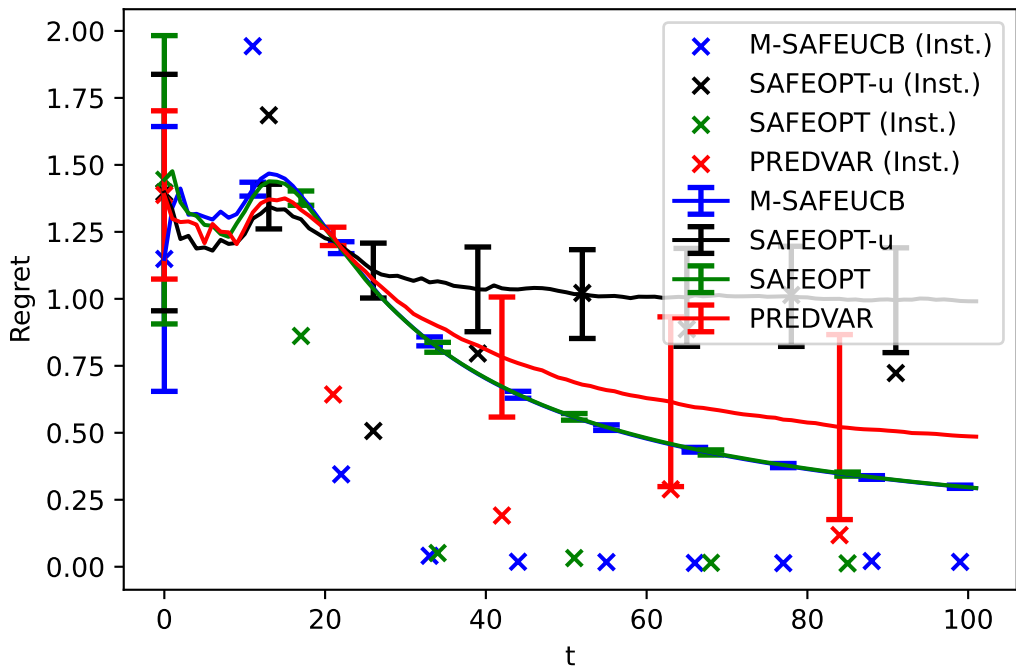

Supplement: supplementary_material [file attachment]

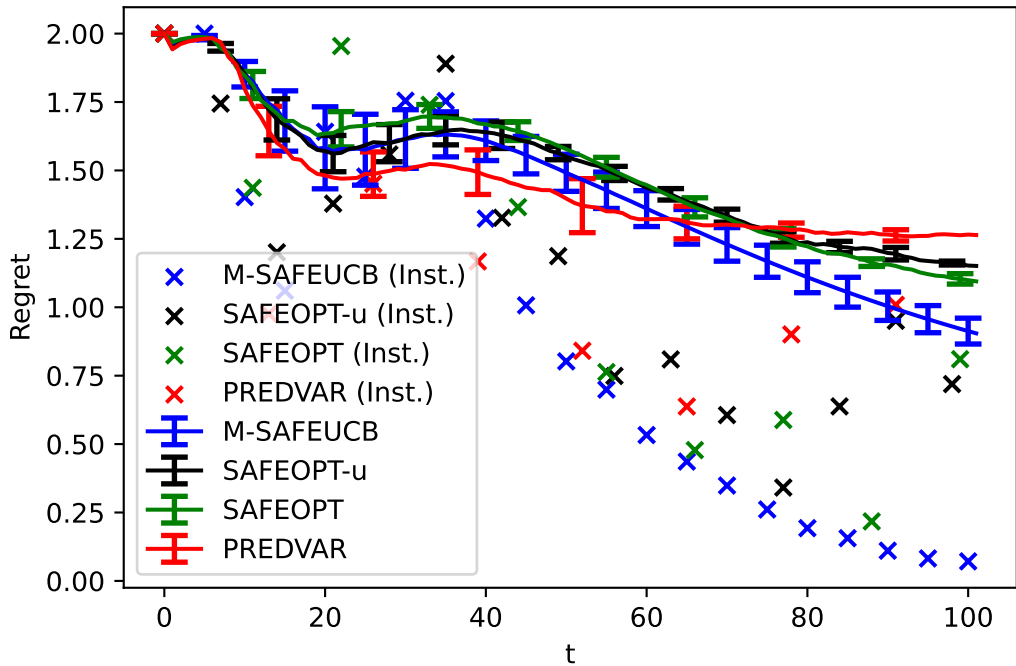

Supplement: supplementary_material [file attachment]

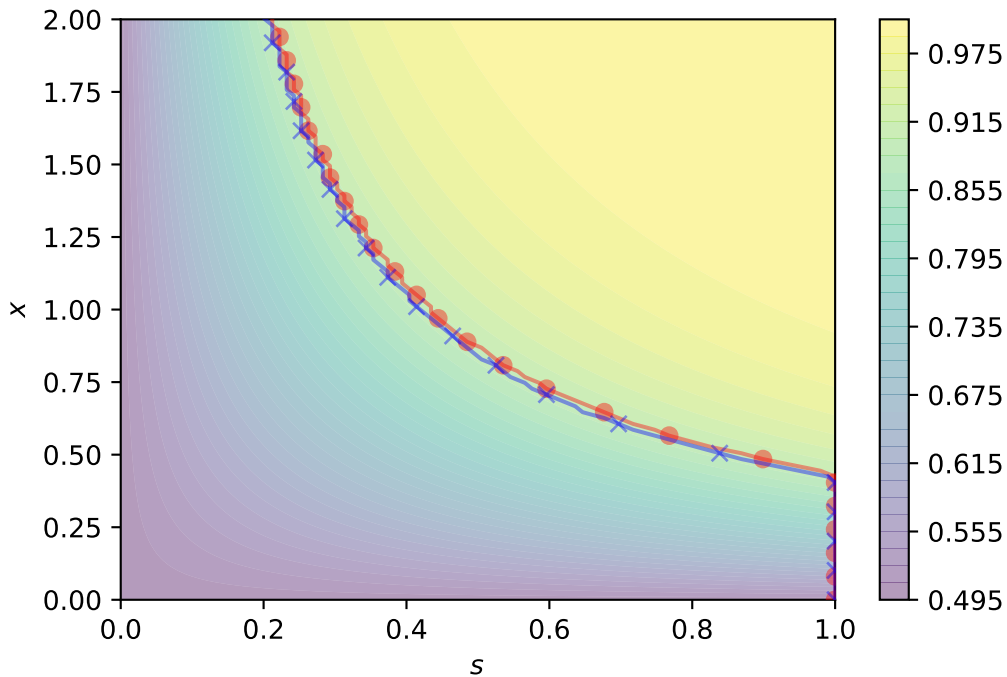

Supplement: supplementary_material [file attachment]

Max. distance to safe boundary

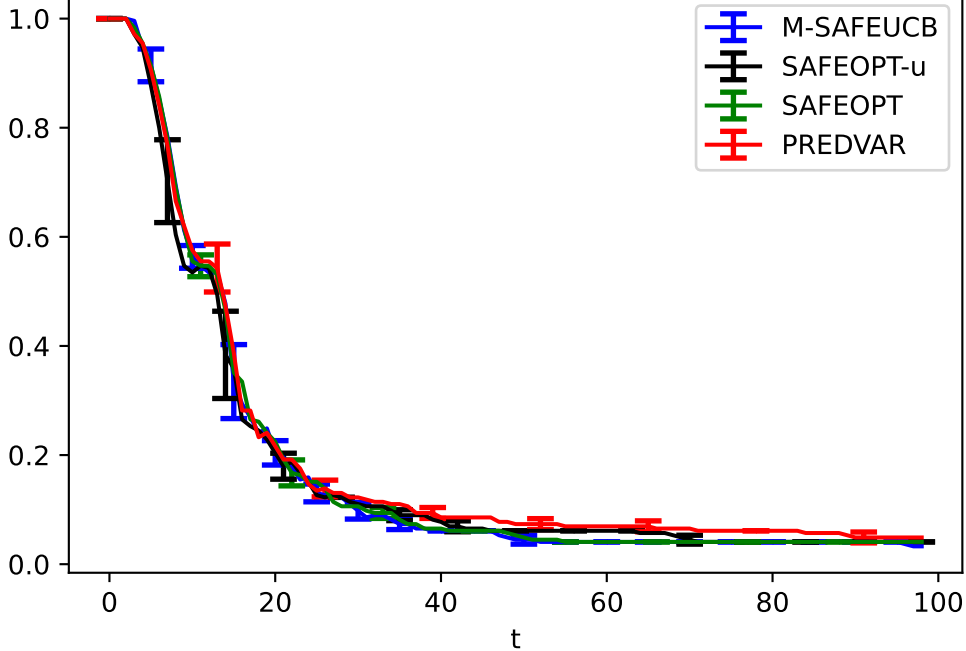

Supplement: supplementary_material [file attachment]

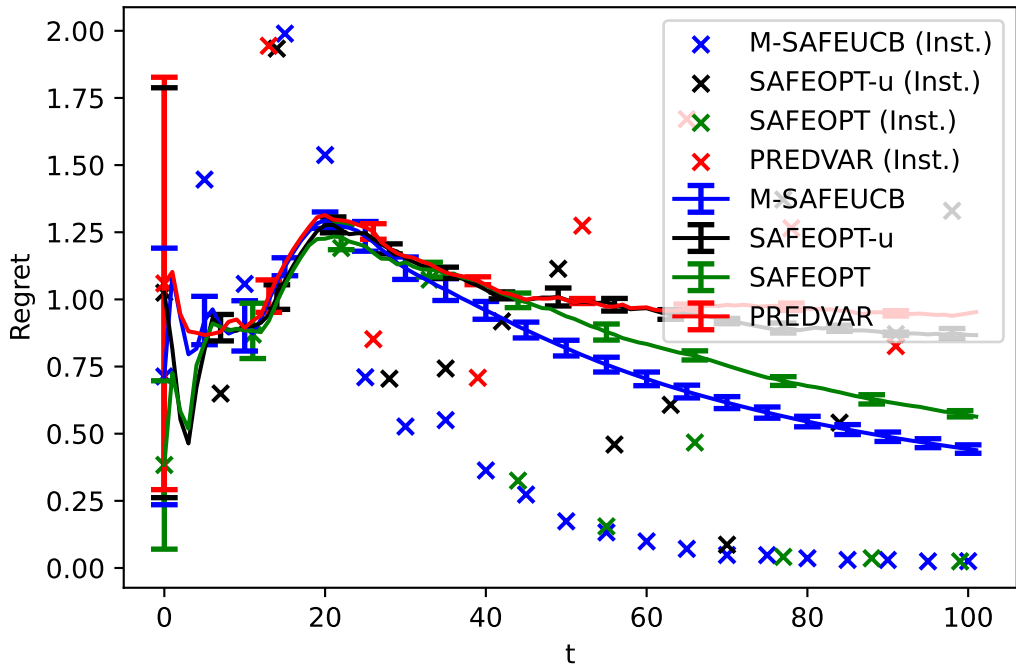

Supplement: supplementary_material [file attachment]

Max. distance to safe boundary

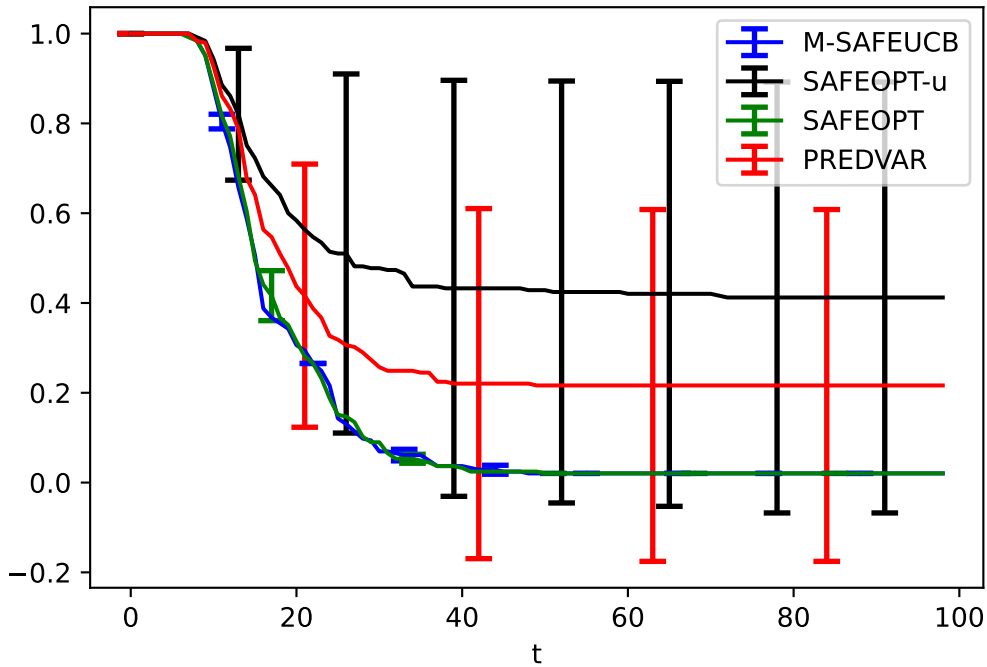

Supplement: supplementary_material [file attachment]

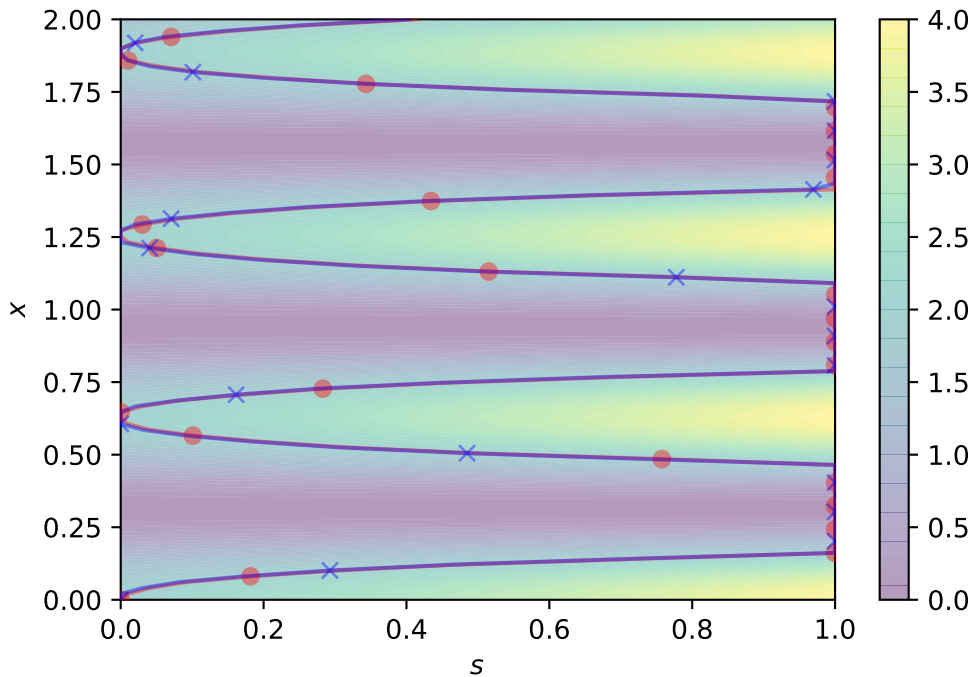

Supplement: supplementary_material [file attachment]

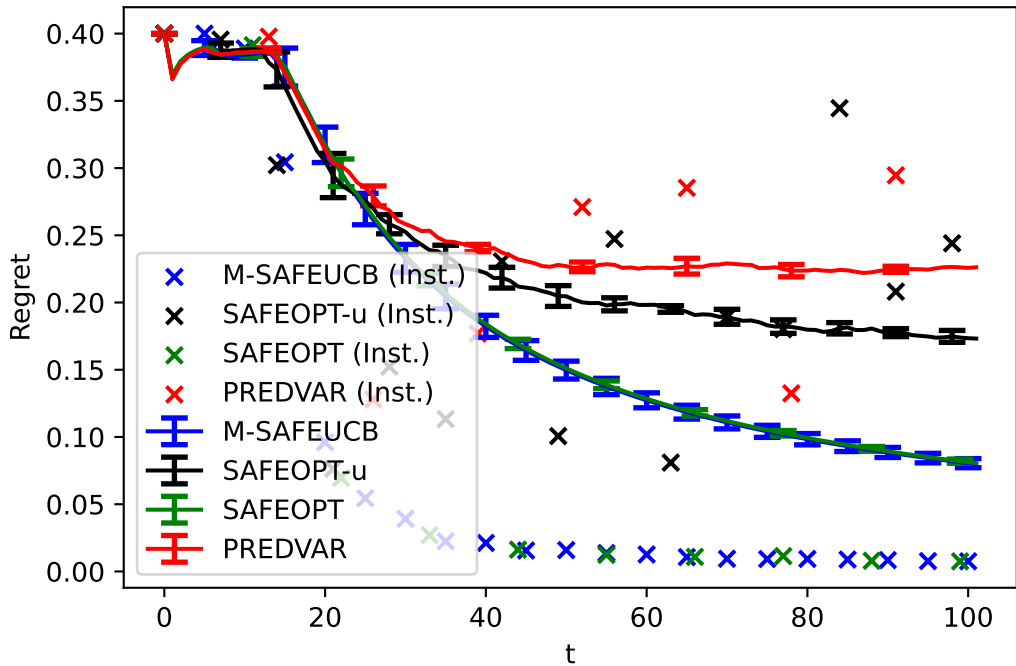

Supplement: supplementary_material [file attachment]

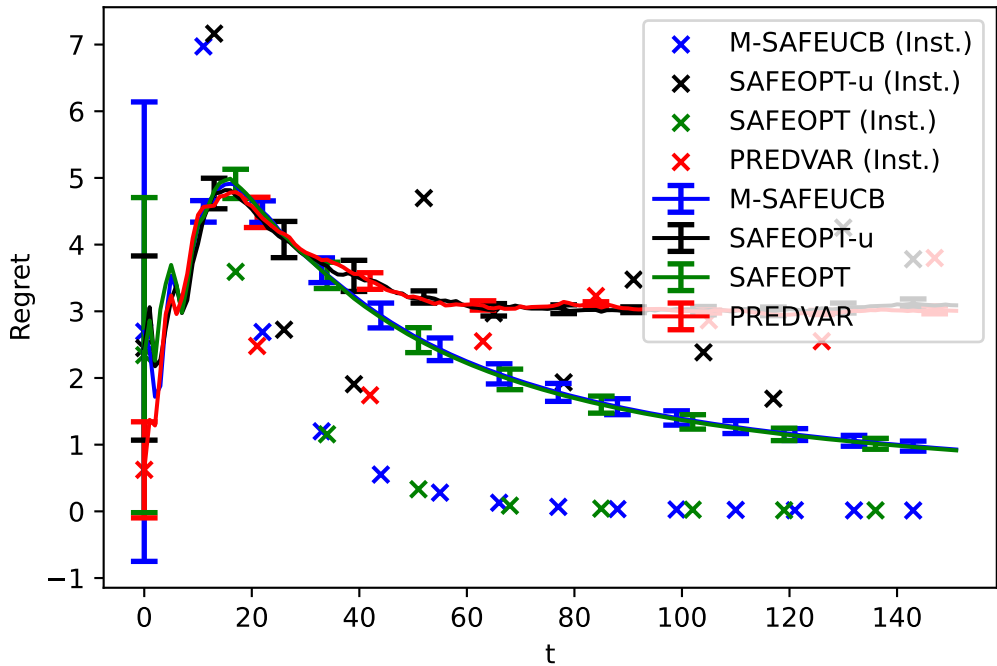

Supplement: supplementary_material [file attachment]

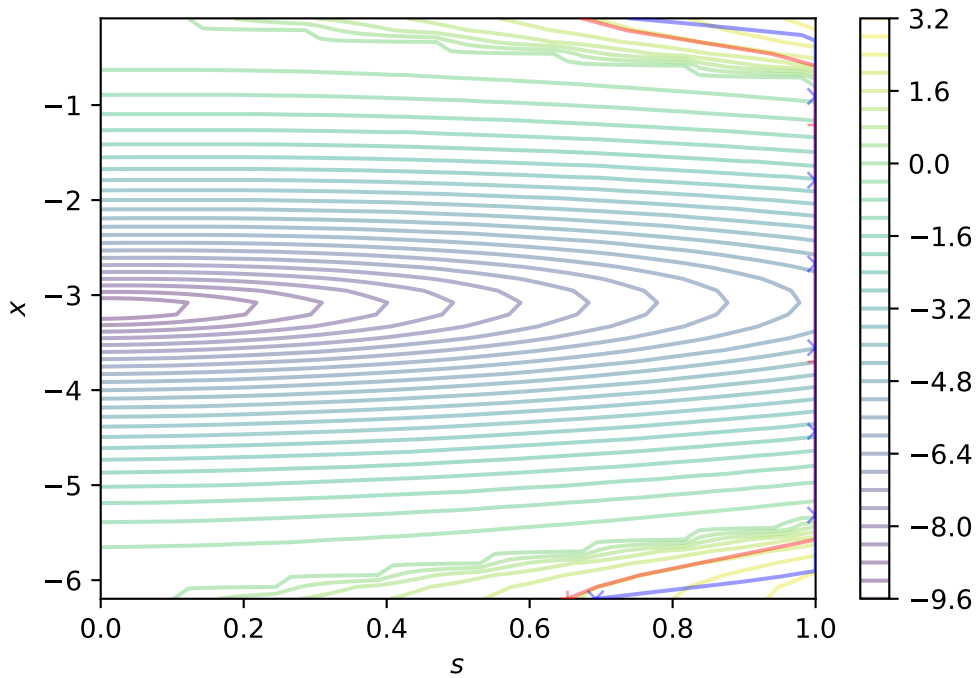

Supplement: supplementary_material [file attachment]

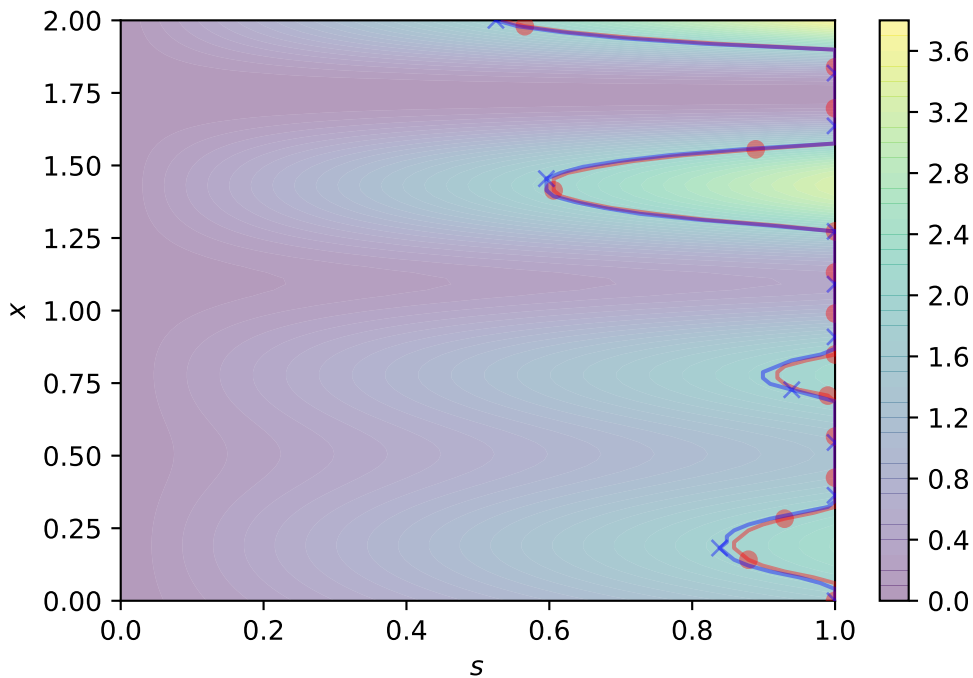

Supplement: supplementary_material [file attachment]

Max. distance to safe boundary

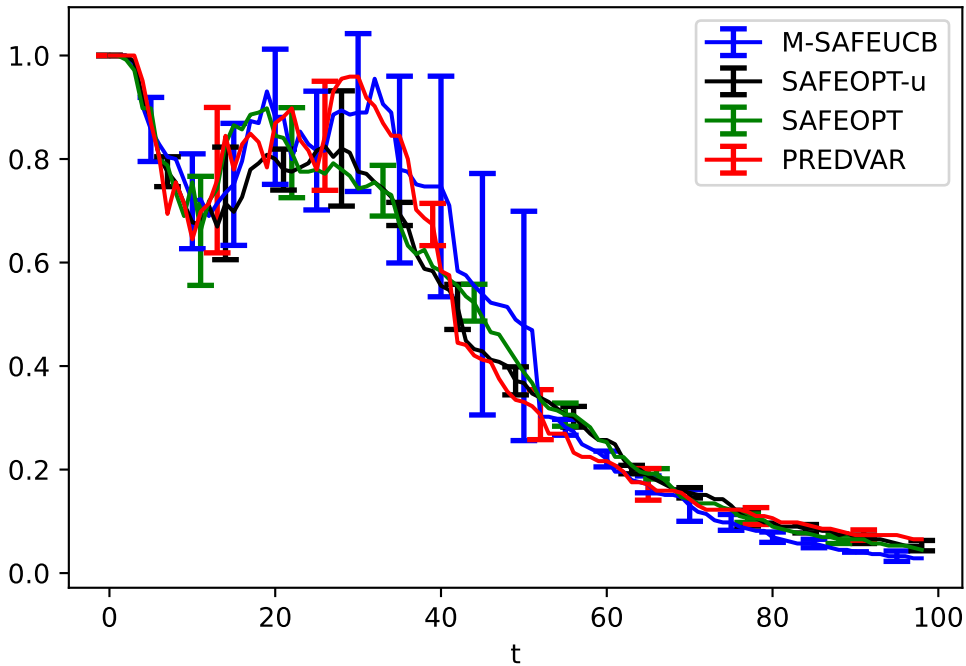

Supplement: supplementary_material [file attachment]
